# Supplementary material for: Phylogenetic and morphological relationships between nonvolant small mammals reveal assembly processes at different spatial scales
Source: PubMed Central journal article supplement (PMC4338971; doi:10.1002/ece3.1407), 2015-01-25

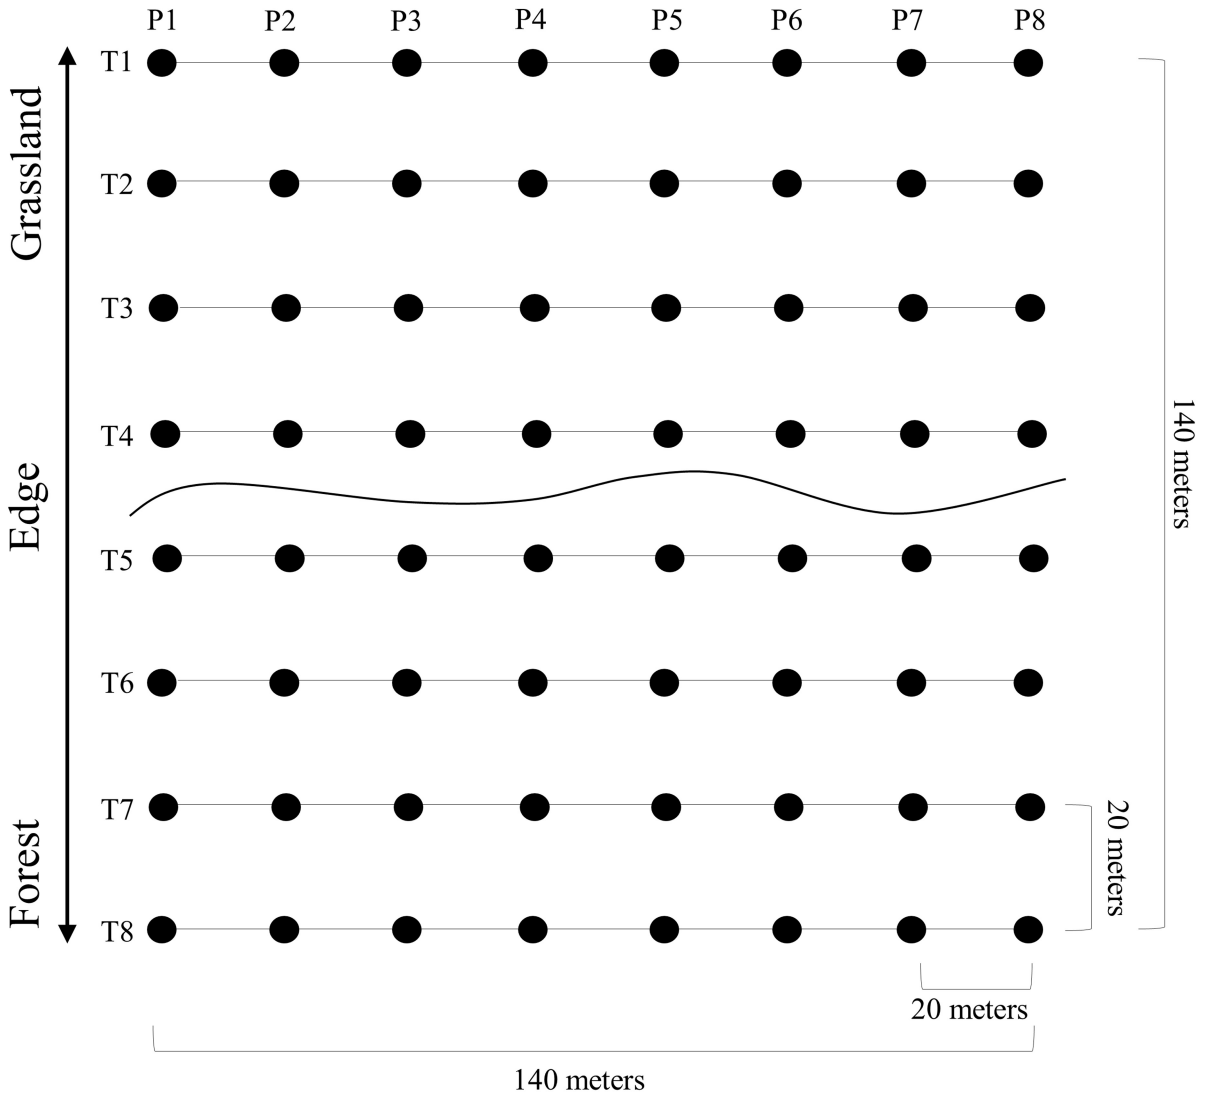

Supplement: ece30005-0889-sd1.pdf [file ece30005-0889-sd1.pdf]
